# Supplementary material for: A novel analytical method to assess the effect of imipenem/cilastatin on liver function laboratory indexes in Chinese underage inpatients: Probability distribution curve
Source: PLoS One. 2019 Oct 24;14(10):e0224352. doi: 10.1371/journal.pone.0224352 (PMC6812810; doi:10.1371/journal.pone.0224352)
Supplement: S1 Data — Data related to this study can be found in S1 Data. (XLSX) [file pone.0224352.s001.xlsx]

## Sheet: Before IMP
Number	Admitting diagnosis	Gender (male =1, female =0)	Age (days)	Delivery date	Withdrawal date	Dosage，mg	Frequency	Test date	TBIL	DBIL	ALT	AST	ALP	Test date	TBIL	DBIL	ALT	AST	ALP	Test date	TBIL	DBIL	ALT	AST	ALP
1	Pulmonary infection	0	2402	2017-10-13	2017-10-20	420	3	2017-10-12	9.4	4.1	13.5	21.5		2017-10-20	9.8	4.2	27.4	47.4
2	Pulmonary infection	0	435	2017-09-08	2017-09-28	125	3	2017-09-05	6.1	3.1	4.1	36.5		2017-09-24	4.1	2.1	4.2	46.9
3	Pulmonary infection	1	1667	2017-01-19	2017-01-23	200	4	2017-01-18	4.2	1.7	12.7	44.6		2017-01-23	3.4	0.9	9.9	44.9
4	Pulmonary infection	1	52	2017-02-01	2017-02-03	70	3	2017-01-29	17.7	8	15	33.6		2017-02-03	9.2	3.7	16.3	34.5
5	Septicemia	1	19	2017-01-23	2017-02-06	38	2	2017-01-22	20.6	5.1	5	12.5		2017-01-26	10	5.4	9.7	56.9
6	Sepsis	1	7	2017-01-22	2017-02-04	38	2	2017-01-20	111	7.2	3.8	30		2017-02-03	10.1	4.5	6.6	34.8
7	Sepsis	1	20	2017-01-31	2017-02-09	36	2	2017-01-31	8.6	3.1	4.3	16		2017-02-04	8.8	4.7	2.2	9.5
8	Septicemia	0	1	2016-12-16	2016-12-30	50	2	2016-12-16	95.1	6.6	6.6	45.8		2016-12-25	125.8	11.1	4	26.1
9	Sepsis	1	5	2017-01-05	2017-01-12	52	2	2017-01-05	170.8	20.5	9.3	71.3		2017-01-11	77	42.8	6.2	185.1
10	Skin and soft tissue infection	1	743	2017-01-11	2017-01-18	500	2	2017-01-11	6.9	2.6	13.3	24.3		2017-01-18	3.2	1.5	9.2	22.5
11	Intracranial infection	1	38	2017-03-01	2017-03-15	40	2	2017-03-01	99.9	9.9	10.1	36.5	309.3	2017-03-14	25.9	13.8	5.5	13.7
12	Sepsis	1	1	2017-01-25	2017-02-15	44	1	2017-01-25	72.4	4.9	6.1	55.5	668.7	2017-02-02	83.6	10.4	16.6	61.2
13	Pulmonary infection	1	54	2017-02-26	2017-03-15	75	3	2017-02-24	11.8	4.8	23	42.1		2017-03-04	26.2	10.9	112.6	266.1
14	Enteritis	1	79	2017-04-13	2017-04-23	100	3	2017-04-13	12.9	5.4	12	28.9		2017-04-20	11.9	5.8	7.1	23.6
15	Others	0	1120	2017-02-13	2017-02-20	200	2	2017-02-13	14.1	6.7	7.6	20.1		2017-02-17	6.8	3.5	13.1	24.8
16	Others	1	102	2017-02-13	2017-02-25	150	3	2017-02-11	8.4	3.5	15	23.8		2017-02-17	6.5	2	17.5	41
17	Sepsis	0	3	2017-03-05	2017-03-10	69	2	2017-03-05	123	14.8	3.5	24.9		2017-03-07	148.7	16.8	6.4	26.1
18	Sepsis	1	30	2017-03-20	2017-03-31	68	2	2017-03-20	8	3.3	5.6	18		2017-03-26	6.5	2.6	11.5	24.8
19	Sepsis	1	2	2017-02-20	2017-03-06	56	2	2017-02-20	103.4	11	4.8	27.4		2017-02-23	171.1	10.1	5.9	84.9
20	Pulmonary infection	0	1765	2017-06-28	2017-07-05	250	3	2017-06-28	10.6	5.4	23.1	91.9		2017-06-29	7	1.4	32.5	104.1
21	Sepsis	1	2	2017-02-22	2017-03-10	60	2	2017-02-20	166.8	10.2	5	17.9	507.5	2017-03-08	19.4	10.2	6.5	24.4
22	Pulmonary infection/Sepsis	0	805	2017-02-11	2017-02-17	220	3	2017-02-09	3.8	1.6	16.7	31.6	868.8	2017-02-17	5	2	16.3	42.3
23	Pulmonary infection	0	31	2017-02-11	2017-02-25	40	2	2017-02-10	5.9	2.9	8	20.7	604.7	2017-02-25	6	3.2	8.8	22.7
24	Pulmonary infection/Intracranial infection	0	527	2017-03-10	2017-03-31	130	3	2017-03-09	5	1.9	14	36.7		2017-03-24	4.6	1.3	17.5	37.9
25	Sepsis	1	90	2017-06-10	2017-06-21	140	3	2017-06-10	20.5	5.8	12.9	31.9		2017-06-19	18.8	8.6	26.2	47.2
26	Sepsis	1	2	2017-03-11	2017-03-20	55	2	2017-03-11	113.6	9.9	7	42.7		2017-03-19	237.2	17.3	3.2	20.5
27	Sepsis	1	14	2017-05-13	2017-05-26	38	2	2017-05-12	35.2	18.8	9.2	23.9		2017-05-25	29.6	16.5	19.2	43.4
28	Septicemia	0	4267	2017-05-17	2017-05-19	300	3	2017-05-17	17.5	8.1	17.4	48.3		2017-05-19	14.8	7	29.6	89.1
29	Septicemia	1	18	2017-05-20	2017-05-29	40	3	2017-05-19	11.1	5.6	7.3	14.5		2017-05-26	13.7	6.4	3	12.3
30	Septicemia	0	26	2017-05-16	2017-05-27	45	3	2017-05-15	39.3	17.4	6.3	15		2017-05-26	39	19.3	14.3	29.2
31	Pulmonary infection	0	32	2017-07-27	2017-07-30	52	2	2017-07-26	29.4	13.8	5.6	18.2		2017-07-28	23.3	10.6	8.4	29.4	873.1
32	Septicemia	1	8	2017-07-05	2017-07-19	70	3	2017-07-04	163.7	11.7	5.7	24.4		2017-07-10	8.8	7.2	8.7	22.6
33	Septicemia	0	1102	2017-05-26	2017-06-07	500	2	2017-05-26	7.1	3	14.5	44.6		2017-06-03	6.5	2.9	18.6	34
34	Sepsis	0	7	2017-06-03	2017-06-10	32	2	2017-06-02	256.6	6.9	4.2	20.4		2017-06-09	151.6	9.6	3.5	16.5
35	Sepsis	1	13	2017-07-05	2017-07-12	80	3	2017-07-04	173.9	10.4	6.7	44.7		2017-07-11	75.2	12.5	5.5	20.4
36	Sepsis	1	13	2017-07-05	2017-07-16	72	2	2017-07-04	158.1	17.3	4.5	31.8		2017-07-19	111.6	32.5	14.4	61.4
37	Sepsis	1	17	2017-09-17	2017-09-28	108	2	2017-09-16	44.8	9.6	12.7	26.9		2017-09-26	10.7	4.6	9	23.8
38	Sepsis	0	18	2017-09-19	2017-10-06	70	2	2017-09-18	18.5	7.4	6	17.8		2017-10-02	12.6	4.9	6.4	16.9
39	Others	1	9	2017-09-18	2017-09-29	106	3	2017-09-17	88	27.2	13.6	45.6	843.3	2017-09-29	63.9	31.1	33.7	62.3
40	Pulmonary infection/Septicemia	1	52	2017-12-11	2017-12-19	60	2	2017-12-09	67.1	31.8	12.3	20.1		2017-12-13	71.4	39.7	9.8	27.4
41	Pulmonary infection/Septicemia	1	16	2017-11-05	2017-11-13	40	2	2017-11-03	117.7	13.5	7.8	36.3		2017-11-11	74.8	15.3	7.5	22.3
42	Pulmonary infection	0	8	2017-08-24	2017-09-06	45	2	2017-08-22	173.3	9.1	5.6	19.2	178.5	2017-09-05	34.1	16.4	6.7	21.8
43	Pulmonary infection/Septicemia	1	14	2017-07-20	2017-07-30	50	2	2017-07-19	13	6.2	6.6	17.6		2017-07-26	6.6	2.2	6.1	24.7
44	Pulmonary infection	1	34	2017-11-13	2017-11-28	66	2	2017-11-13	12.3	6.6	40.4	37.4		2017-11-19	9.5	4.3	52.8	126.2
45	Septicemia	1	4	2017-11-07	2017-11-26	45	2	2017-11-06	121.3	15.4	4	28.1		2017-11-23	39.5	18.7	3.7	27.9
46	Septicemia	0	5	2017-11-23	2017-12-05	34	2	2017-11-23	113.4	7.4	4.1	19.1		2017-12-04	52.5	10.4	3.9	20.2
47	Septicemia	1	18	2017-12-03	2017-12-14	24	2	2017-12-03	21.7	13.3	8.8	25.6	580.6	2017-12-11	10.1	5.6	3.8	11.7
48	Sepsis	1	2304	2017-03-01	2017-03-06	300	3	2017-02-28	6.1	2.9	13.4	20.7		2017-03-02	5.6	2.5	16.4	20.5
49	Septicemia	1	6	2017-05-19	2017-05-31	110	3	2017-05-18	230.2	16.7	19.7	31.8		2017-05-21	53.4	16	18.2	31.3
50	Septicemia	1	7	2017-07-09	2017-07-14	65	2	2017-07-09	168.3	10	5.6	26.9		2017-07-13	122	8.2	4.6	22.8	443.4
51	Pulmonary infection	0	6111	2017-06-30	2017-07-09	500	4	2017-06-29	22.1	9.1	24.2	23.3		2017-07-04	21.6	8.7	27.1	24.1
52	Septicemia	1	23	2017-10-30	2017-11-02	50	2	2017-10-29	4.9	2.3	6.6	15.4		2017-11-02	3	1.7	7.6	17.7
53	Others	1	3663	2017-11-18	2017-11-30	500	3	2017-11-16	3.5	1.3	22.2	28.7	266.3	2017-11-22	7.4	2.8	17.4	25.6
54	Pulmonary infection	0	1318	2017-01-11	2017-01-18	250	3	2017-01-09	3.8	1.4	22.9	30.5		2017-01-18	2.9	1.7	47.8	34.2
55	Pulmonary infection	0	45	2017-02-09	2017-02-21	60	3	2017-02-09	6.9	3.6	25.7	43.5	737.1	2017-02-16	18	4.2	36.1	44.7	675.9	2017-02-21	7.2	3	19.1	47.7
56	Others	1	1117	2017-03-02	2017-03-14	500	2	2017-03-01	20.2	9.4	7.3	20.6		2017-03-04	9.7	3.6	22.1	52.1		2017-03-05	5.2	2.3	11.5	21.1
57	Septicemia	0	14	2017-02-17	2017-03-01	135	3	2017-02-17	9.9	4.5	32	30.1		2017-02-25	28.5	4.9	33.1	404.7		2017-03-15	7.6	3.7	33.5	30.1	575.9
58	Pulmonary infection	0	1177	2017-02-21	2017-03-05	150	3	2017-02-21	6.3	2.2	15.7	42.6		2017-02-28	18	2.9	46.9	54.8
59	Pulmonary infection	1	3588	2017-05-19	2017-05-31	500	3	2017-05-19	4.3	1.4	8.1	20.2	423.6	2017-05-27	26.4	7.1	46.5	27.1
60	Skin and soft tissue infection	1	638	2017-04-21	2017-04-26	300	2	2017-04-20	6.8	2.3	16.3	23.5	818.1	2017-04-24	13	6.7	22.1	25.3
61	Skin and soft tissue infection	1	1386	2017-08-10	2017-08-21	350	3	2017-08-09	9.5	3.2	30.4	32.2		2017-08-17	13.2	3.3	38.2	40.9		2017-08-14	3	1.5	28.5	32
62	Enteritis	1	10	2017-10-21	2017-10-30	68	2	2017-10-21	95.8	10.6	11.7	29.8	91.3	2017-10-26	16.9	8.8	15.4	28.1
63	Pulmonary infection	1	293	2017-09-24	2017-09-27	160	3	2017-09-24	9.3	3.9	15.7	35.9	1077.4	2017-09-26	10.2	3.6	44.2	23.7	213.3
64	Septicemia	1	7	2017-08-20	2017-08-31	45	2	2017-08-20	177.4	11.9	2.8	17.8		2017-08-25	24.5	4	17.3	43.6
65	Pulmonary infection	1	51	2017-11-09	2017-11-12	84	2	2017-11-07	20.4	9.2	8.7	19.8		2017-11-11	18.5	9.4	24.4	700.6	1228.2	2017-11-22	15.1	7.5	9.5	24.7	1037.3
66	Enteritis	1	54	2017-11-12	2017-11-23	84	3	2017-11-10	8.9	4.3	23.4	20.8	289.5	2017-11-16	10.1	5.2	25.3	26.1	293.6
67	Septicemia	1	0	2017-11-09	2017-11-14	36	1	2017-11-08	54.9	5.9	5.4	49.7		2017-11-12	8.1	5.6	65.3	193.7		2017-11-12	73.7	5.3	6.2	43
68	Septicemia	1	5	2017-11-14	2017-11-25	36	2	2017-11-12	107.5	10.6	8.5	17		2017-11-16	9.3	8.7	19.5	140.5		2017-11-17	73.8	10.1	8.6	22.2	157.4
69	Septicemia	0	1	2017-11-06	2017-11-21	39	1	2017-11-06	119.6	6.8	10.4	83.1		2017-11-08	7.7	6.9	42.9	441.6	571.8	2017-11-17	127.5	9.4	6.1	21.7	675.2
70	Pulmonary infection	1	526	2017-11-20	2017-11-28	150	3	2017-11-19	3.4	1	20.5	41.8	849	2017-11-28	7.7	4.5	49.8	58.3
71	Pulmonary infection	1	109	2017-10-28	2017-11-22	100	3	2017-10-28	5.8	2.7	19.4	28.7	581.3	2017-11-15	8.9	4.3	128.1	112.9		2017-11-16	16.5	7.9	32.6	87.9
72	Pulmonary infection	1	472	2017-01-06	2017-01-15	200	3	2017-01-05	3.2	1.4	21.4	33.2		2017-01-15	10.6	4.1	26.1	30.9	864.8
73	Pulmonary infection	0	2801	2016-11-15	2016-11-22	500	3	2016-11-15	2.4	1.2	8.2	27.1		2016-11-17	8.5	3	28.4	30.4		2016-11-18	6	1.9	7.1	29.7
74	Pulmonary infection	0	2808	2016-11-22	2016-12-22	500	2	2016-11-22	6.5	2.6	5.2	28.7		2016-11-25	5.5	2.2	24.6	47.6		2016-11-29	5.2	2	4.1	20.8

## Sheet: After IMP
Number	Admitting diagnosis	Gender (male =1, female =0)	Age (days)	Delivery date	Withdrawal date	Dosage，mg	Frequency	Test date	TBIL	DBIL	ALT	AST	ALP	Test date	TBIL	DBIL	ALT	AST	ALP	Test date	TBIL	DBIL	ALT	AST	ALP	Test date	TBIL	DBIL	ALT	AST	ALP		Test date	TBIL	DBIL	ALT	AST	ALP
75	Pulmonary infection	0	2402	2017-10-13	2017-10-20	420	3	2017-10-15	4.1	1.8	18.3	20.2		2017-10-20	9.8	4.2	27.4	47.4
76	Pulmonary infection	1	143	2017-09-08	2017-09-28	125	3	2017-09-15	2.9	1.7	5.5	27.3		2017-09-17	4.9	1.9	2.9	18.5		2017-09-24	4.1	2.1	4.2	46.9
77	Pulmonary infection	1	307	2017-04-18	2017-04-25	180	3	2017-04-20	9.1	3.4	20.7	31.6		2017-04-24	3.1	1.3	23.6	40.5
78	Pulmonary infection	1	1667	2017-01-19	2017-01-23	200	4	2017-01-21	2.4	1.1	14.2	30.7		2017-01-23	3.4	0.9	9.9	44.9
79	Pulmonary infection	1	50	2017-01-30	2017-02-03	70	3	2017-02-01	10.3	4.5	14.6	37.2		2017-02-03	9.2	3.7	16.3	34.5
80	Septicemia	1	19	2017-01-23	2017-02-06	38	2	2017-01-26	10	5.4	9.7	56.9		2017-01-27	14.2	7.5	9	51.7	424.1	2017-01-28	11.7	5.7	9.5	36.3		2017-01-30	10.6	4.6	7	29.5	405.9
81	Sepsis	1	4370	2017-01-06	2017-01-13	500	3	2017-01-09	10.3	6.7	8.9	7.1		2017-01-12	12.4	6.2	9.7	7.4
82	Pulmonary infection	1	9	2017-01-27	2017-02-10	120	2	2017-01-30	18.2	8.3	19.3	28		2017-02-05	15.8	6	10.3	28
83	Septicemia	1	7	2017-01-22	2017-02-04	38	2	2017-01-27	22.5	8.2	3.4	25.1	426.8	2017-02-03	10.1	4.5	6.6	34.8
84	Intracranial infection	1	5	2017-01-15	2017-01-25	58	2	2017-01-17	171	13.1	5.1	13.5	308.7	2017-01-19	97.5	8.3	3.9	17.7		2017-01-24	37.7	14.9	2.3	15.9	800
85	Septicemia	1	20	2017-01-31	2017-02-09	36	2	2017-02-04	8.8	4.7	2.2	9.5		2017-02-08	12.9	9.6	1.6	12.3
86	Pulmonary infection	0	465	2017-02-23	2017-02-27	150	3	2017-02-23	21.1	6.9	21.8	70.7		2017-02-24	10.1	4.3	18.3	44.6		2017-02-26	5.9	2.6	21.1	53.9		2017-02-28	5	1.9	24.4	62.2
87	Pulmonary infection	0	1	2016-12-16	2016-12-30	50	2	2016-12-17	87.5	7.7	59.6	71.4		2016-12-18	117.8	9.7	9.7	52.8		2016-12-21	157.7	11.7	6.1	20.6		2016-12-25	125.8	11.1	4	26.1	715.9
88	Pulmonary infection	0	77	2016-12-31	2017-01-11	6	3	2017-01-04	7.2	3.5	30.6	47.2		2017-01-06	27.1	13.2	18.6	131.7		2017-01-07	20.5	9.5	66.7	94.1		2017-01-09	10.8	4.3	48.4	27.1
89	Septicemia	1	5	2017-01-05	2017-01-12	52	2	2017-01-07	110.4	41.2	6.9	31		2017-01-10	65.9	32.9	3	18.5		2017-01-11	77	42.8	6.2	185.1
90	Skin and soft tissue infection	1	743	2017-01-11	2017-01-18	500	2	2017-01-14	9.8	4.3	10.6	23.4		2017-01-18	3.2	1.5	9.2	22.5
91	nephritic syndrome	0	1318	2017-01-11	2017-01-18	250	3	2017-01-11	3.8	1.4	22.9	30.5		2017-01-18	4.4	2	29.1	47.8
92	Pulmonary infection	0	283	2017-01-14	2017-01-26	120	3	2017-01-14	6.9	2.6	14	44.1		2017-01-20	2.1	1	9.7	34.2		2017-01-26	1.9	0.7	99.4	180.3
93	Septicemia	1	38	2017-03-01	2017-03-15	40	2	2017-03-08	30.4	17	5.2	18		2017-03-14	25.9	13.8	5.5	13.7
94	Septicemia	1	36	2017-03-01	2017-03-15	52	2	2017-03-07	7.3	3.9	6.7	19.4		2017-03-11	7	3.1	5.3	20.7	766.6
95	Septicemia	1	1	2017-01-25	2017-02-15	44	1	2017-01-26	106	9.8	4.4	34.6		2017-01-27	104.5	13.9	3.4	16.3		2017-01-28	101.7	10.3	5.8	34.1		2017-01-31	128	15.5	18.6	52.1	184.1
96	Sepsis	1	54	2017-02-26	2017-03-15	75	3	2017-02-28	11.8	4.8	23	42.1		2017-03-03	44.1	5.7	27.1	186.9		2017-03-04	26.2	10.9	112.6	266.1		2017-03-05	38.2	15.1	111.9	165.8
97	Septicemia	1	45	2017-02-09	2017-02-21	60	3	2017-02-09	6.9	3.6	25.7	43.5		2017-02-16	7	2.6	18	36.1		2017-02-21	7.2	3	19.1	47.7
98	Septicemia	1	108	2017-04-13	2017-04-23	100	3	2017-04-16	8.9	5.1	22.9	37.1		2017-04-19	9.2	4.7	23.5	42.1
99	Septicemia	1	118	2017-04-23	2017-04-26	112	3	2017-04-13	12.9	5.4	12	28.9	1764.5	2017-04-20	11.9	5.8	7.1	23.6		2017-04-24	14.5	5.4	9.4	33.6	1712.9
100	Skin and soft tissue infection	0	1120	2017-02-13	2017-02-20	200	2	2017-02-13	14.1	6.7	7.6	20.1		2017-02-17	6.8	3.5	13.1	24.8
101	Skin and soft tissue infection	1	102	2017-02-13	2017-02-25	150	3	2017-02-14	8.4	3.5	15	23.8		2017-02-17	6.5	2	17.5	41		2017-02-21	4	1.5	16.8	30.3		2017-02-24	4.2	2	16.8	28
102	Pulmonary infection	0	3	2017-03-05	2017-03-10	69	2	2017-03-05	123	14.8	3.5	24.9		2017-03-07	148.7	16.8	6.4	26.1
103	Sepsis	1	395	2018-03-20	2018-03-31	68	2	2018-03-25	6.5	2.6	11.5	24.8	535.5	2018-03-29	6.1	3.5	14.8	22.1
104	Septicemia/Intracranial infection	1	2	2017-02-20	2017-03-06	56	2	2017-02-23	171.1	10.1	5.9	84.9	268.6	2017-02-27	120	10.5	5.4	25.8		2017-02-28	115.6	12.9	4.7	28.5		2017-03-05	27.9	14.7	5.8	23.2	508
105	Pulmonary infection	0	1765	2017-06-28	2017-07-05	250	3	2017-06-29	1.4	7	32.5	104.1		2017-07-03	8.4	3.3	22.3	30.1
106	Pulmonary infection	0	1117	2017-03-02	2017-03-14	500	2	2017-03-03	20.2	9.4	7.3	20.6		2017-03-04	8.9	3.6	9.7	22.1		2017-03-05	5.2	2.3	11.5	21.1		2017-03-06	5.1	2.5	12.8	21.4
107	Septicemia	1	2	2017-02-22	2017-03-10	60	2	2017-02-26	166.8	10.2	5	17.9		2017-03-05	36.8	11.2	4.6	21.6	341.5	2017-03-08	19.4	10.2	6.5	24.4
108	Pulmonary infection	1	14	2017-02-17	2017-03-01	135	3	2017-02-17	9.9	4.5	32	30.1		2017-03-05	2.6	1.2	28.5	33.1	404.7	2017-03-15	7.6	3.7	33.5	30.1	575.9
109			43160	2018-03-01	2018-03-06	183	3	2018-03-03	20.3	12.7	33	39.2		2018-03-06	19.5	10.6	38.2	43.9
110			43165	2018-03-06	2018-03-17	163	3	2018-03-08	6.1	3.7	20.6	28.3		2018-03-15	5.9	4.8	21.7	33.4
111	Pulmonary infection	0	805	2017-02-11	2017-02-17	220	3	2017-02-12	3.8	1.6	16.7	31.6		2017-02-17	5	2	16.3	42.3
112	Intracranial infection	1	13	2017-02-18	2017-02-28	53	2	2017-02-18	132.5	8.9	1.8	23.9	847	2017-02-27	53.6	7.9	5.4	15.4
113	Sepsis	0	1177	2017-02-21	2017-03-05	150	3	2017-02-21	6.3	2.2	15.7	42.6		2017-02-28	6.8	2.5	18	46.9
114	Pulmonary infection	0	31	2017-02-11	2017-02-25	40	2	2017-02-14	5.9	2.9	8	20.7		2017-02-20	4.9	2	8.7	22.7	435.7	2017-02-25	6	3.2	8.8	22.7
115	Sepsis	0	527	2017-03-10	2017-03-31	130	3	2017-03-12	5	1.9	14	36.7		2017-03-24	4.6	1.3	17.5	37.9
116	Septicemia	1	90	2017-06-10	2017-06-21	140	3	2017-06-14	18.2	7.9	13.9	23.7	843.3	2017-06-19	18.8	8.6	26.2	47.2
117	Others	0	39	2017-04-21	2017-05-05	35	3	2017-04-21	68.5	38.1	16.2	43.3		2017-04-28	85.9	45.1	21.5	67.2	3059.9	2017-05-02	93.4	53.2	27.1	73.7	2505.3
118	Septicemia	1	2	2017-03-11	2017-03-20	55	2	2017-03-12	187	10.8	8.7	82.8		2017-03-13	222.1	9.2	5.9	40.2		2017-03-15	242.8	13.5	4.4	15.5		2017-03-17	225.7	11.1	3.2	28.3
119	Septicemia	0	2	2017-04-01	2017-04-06	12	2	2017-04-01	102	7.4	10.2	51.5	178.5	2017-04-02	96.5	9.8	12.5	86		2017-04-04	166.9	25.7	55.4	218.8
120	Septicemia	1	28	2017-05-11	2017-05-25	72	3	2017-05-11	98.8	33.3	8.6	17.7		2017-05-16	64.9	29.4	5.5	14.6		2017-05-19	51.7	19.3	10.9	34.5		2017-05-24	63.3	28.5	7.9	20.3
121	Sepsis	1	14	2017-05-13	2017-05-26	38	2	2017-05-15	40.8	21	14.1	39.2		2017-05-25	29.6	16.5	19.2	43.4
122	Pulmonary infection	0	4266	2017-05-16	2017-05-17	300	4	2017-05-17	17.5	8.1	17.4	48.3		2017-05-18	11.8	5.5	11.4	20.1		2017-05-19	14.8	7	29.6	89.1
123	Pulmonary infection	1	3588	2017-05-19	2017-05-31	500	3	2017-05-19	4.3	1.4	8.1	20.2		2017-05-27	1.5	0.5	26.4	46.5
124	Pulmonary infection	1	32	2017-06-03	2017-06-11	50	2	2017-06-05	12.3	6.2	6.2	21.7	580.6	2017-06-08	20.7	9.4	6.4	17.9	780.9
125	Septicemia	1	18	2017-05-20	2017-05-29	40	3	2017-05-21	11.1	5.6	7.3	14.5		2017-05-26	13.7	6.4	3	12.3	443.4
126	Pulmonary infection	0	3324	2017-03-18	2017-03-23	450	3	2017-03-19	4.2	1.5	20.8	43		2017-03-20	4.6	1.6	29.7	105.4		2017-03-21	2.8	1.2	19.5	44.8		2017-03-22	3.7	1.6	28.4	65.3
127	Skin and soft tissue infection	1	638	2017-04-21	2017-04-26	300	2	2017-04-22	6.8	2.3	16.3	23.5		2017-04-24	3.1	1	13	22.1
128	Sepsis	0	26	2017-05-16	2017-05-27	45	3	2017-05-18	39.3	19.9	5.6	18.1		2017-05-23	46.2	23.1	15.1	28.5		2017-05-26	39	19.3	14.3	29.2										2017-06-26	14:37:00	85.7	43.9	87.7	152.5
129	Septicemia	1	109	2017-10-12	2017-10-28	85	2	2017-10-12	56.7	34.2	102.4	217.2		2017-10-14	46.3	27.8	167.5	84.5
130	Pulmonary infection	1	70	2017-09-03	2017-09-06	64	2	2017-09-07	32.5	15.2	33.5	41.9	266.3	2017-09-11	42.2	17.2	43.9	45.8	675.9	2017-09-22	54.7	32.8	44.3	64.5	1541.1
131	Septicemia	1	32	2017-07-27	2017-07-30	52	2	2017-07-28	23.3	10.6	8.4	29.4		2017-07-29	17.8	8.1	5.1	17.9
132	Septicemia	1	8	2017-07-03	2017-07-09	40	2	2017-07-05	17.5	7.9	13.7	26.8		2017-07-08	104.9	47.1	59.1	62.5	737.1
133	Pulmonary infection	0	176	2017-11-16	2017-11-27	100	3	2017-11-17	6.2	2.5	12.9	34.4		2017-11-17	5.8	3.1	15.8	24.3		2017-11-20	6	2.3	4.8	18.5		2017-11-23	8	3.2	5.7	24
134	Septicemia	1	8	2017-07-05	2017-07-19	70	3	2017-07-10	8.8	8.2	8.7	22.6		2017-07-15	10.7	9.2	18.6	27.4
135	Skin and soft tissue infection	0	1102	2017-05-26	2017-06-07	500	2	2017-05-27	25	10.7	6.1	35.5		2017-05-29	15.3	6.6	8.5	24.9		2017-05-31	5.9	2.4	7.5	20.4		2017-06-03	6.5	2.9	18.6	34
136	Septicemia	0	7	2017-06-03	2017-06-10	32	2	2017-06-04	256.6	6.9	4.2	20.4	423.6	2017-06-04	193.7	13.7	5.8	23.3		2017-06-09	151.6	9.6	3.5	16.5
137	Pulmonary infection	1	13	2017-07-05	2017-07-12	80	3	2017-07-08	62.1	10.5	8.4	23.7	818.1	2017-07-11	75.2	12.5	5.5	20.4	818.1
138	Septicemia	0	0	2017-07-05	2017-07-10	34	2	2017-07-07	40.8	15.2	4.6	31.6		2017-07-08	63.1	7.4	5.3	54.3	213.3
139	Septicemia	1	1	2017-07-18	2017-07-20	38	1	2017-07-18	59.7	5.5	3.4	53.2	91.3	2017-07-20	99.3	15.5	5.9	81.8
140	Pulmonary infection	1	13	2017-07-05	2017-07-16	72	2	2017-07-13	84.2	37.8	8.1	30.5	1077.4	2017-07-19	111.6	32.5	14.4	61.4	1228.2
141	Others	0	6111	2017-06-30	2017-07-09	500	4	2017-07-01	20.7	8.5	24.7	25.7		2017-07-03	24.2	10.5	21.2	18.9		2017-07-04	21.6	8.7	27.1	24.1		2017-07-05	21.8	9.2	23.9	17.7
142	Skin and soft tissue infection	1	1386	2017-08-10	2017-08-21	350	3	2017-08-10	9.5	3.2	50.4	52.2		2017-08-11	7	3.4	39.6	33.8		2017-08-14	3	1.5	28.5	32		2017-08-17	3.1	1.3	30.5	38.2
143	Intracranial infection	1	17	2017-09-17	2017-09-28	108	2	2017-09-22	17.5	7.5	6	20	289.5	2017-09-26	10.7	4.6	9	23.8
144	Septicemia	0	18	2017-09-19	2017-10-06	70	2	2017-09-21	9.8	3.1	71.1	42.8		2017-09-28	7.5	3.1	10.2	17.6	571.8	2017-10-02	12.6	4.9	6.4	16.9	668.4
145	Pulmonary infection	0	42	2017-08-07	2017-08-09	70	3	2017-08-08	3.5	1	53	90.2		2017-08-12	5	1.6	31.4	43.5
146	Enteritis	1	360	2017-08-08	2017-08-20	150	3	2017-08-09	7.6	3.4	39.3	44.4		2017-08-10	4.8	1.9	22.7	36.1		2017-08-10	5.7	2.6	21.2	33.6		2017-08-11	5.2	1.3	27.8	49.4
147	Pulmonary infection/Septicemia	0	23	2017-10-14	2017-10-20	56	2	2017-10-14	52.9	30	21.8	28.3	849	2017-10-21	33.9	18.7	30	54.9
148	Septicemia	1	10	2017-10-21	2017-10-30	68	2	2017-10-21	95.8	10.6	11.7	29.8	581.3	2017-10-26	62.2	16.9	8.8	15.4
149	Septicemia	1	2	2017-10-16	2017-10-25	40	1	2017-10-17	96.5	11.2	2.2	28	309.3	2017-10-17	115.1	9.7	2.7	26.1		2017-10-20	165.8	10.2	2.3	18.4	503.9	2017-10-23	186.1	14.6	0.9	18.8	778.9
150	Enteritis	0	40	2017-10-30	2017-11-12	71	2	2017-10-30	34.5	16.7	21.1	44.9	668.7	2017-11-02	22.8	8.5	23	27.2		2017-11-07	11.3	4.7	11.7	23.2	822.3	2017-11-12	9.5	4.5	9.7	19.2
151	Peritonitis	1	9	2017-09-18	2017-09-29	106	3	2017-09-20	85.8	23.3	15.1	67.4	507.5	2017-09-29	63.9	31.1	33.7	62.3	873.1
152	Pulmonary infection/Septicemia	1	52	2017-12-11	2017-12-19	60	2	2017-12-13	71.4	39.7	9.8	27.4	868.8	2017-12-17	67.9	23.1	32.6	23.7
153	Septicemia	1	16	2017-11-05	2017-11-13	40	2	2017-11-06	117.7	13.5	7.8	36.3	604.7	2017-11-07	172.2	17.6	11.2	44.8		2017-11-08	132.1	15	10.9	47.4		2017-11-10	73.4	12.9	5.3	22.8
154	Sepsis	0	356	2017-11-12	2017-11-20	90	4	2017-11-13	37.8	20.7	452.8	1378.9		2017-11-14	30.1	14.5	428.9	1003.5		2017-11-15	25.7	12.7	275.3	592.4		2017-11-16	26.7	12.2	493.9	1162.6
155	Pulmonary infection/Septicemia	0	331	2017-09-15	2017-09-28	120	3	2017-09-23	6	2.5	35	49.2		2017-09-26	7.4	3.9	32.6	44.7
156	Sepsis	0	8	2017-08-24	2017-09-06	45	2	2017-08-27	121.8	14.2	5.4	31.1	855.8	2017-08-31	72.8	17.4	5.1	24.6		2017-09-05	34.1	16.4	6.7	21.8	1078.7
157	Pulmonary infection	1	293	2017-09-24	2017-09-27	160	3	2017-09-24	9.3	3.9	15.7	35.9	231.4	2017-09-26	6.2	2.6	16.2	44.2		2017-09-27	6.1	3.3	11.5	28.2
158	Septicemia	1	7	2017-08-20	2017-08-31	45	2	2017-08-20	177.4	11.9	2.8	17.8		2017-08-25	61.1	24.5	4	17.3
159	Septicemia	1	14	2017-07-20	2017-07-30	50	2	2017-07-24	6.6	2.2	6.1	24.7	437.6	2017-07-28	7.7	3.9	13.7	32.5
160	Pulmonary infection	1	34	2017-11-13	2017-11-28	66	2	2017-11-16	10.2	4.7	36.8	74.1	443.2	2017-11-19	9.5	4.3	52.8	126.2	442.3	2017-11-25	8.9	4.2	34	63.9	484.6
161	Pulmonary infection	1	4	2017-11-07	2017-11-26	45	2	2017-11-10	109.2	13.9	4.5	31	396.8	2017-11-12	82.4	14.8	8.9	49.5	347.3	2017-11-14	74.7	27.1	19.5	39.5	442.7	2017-11-19	45.5	24.8	5.5	16.6	512.8
162	Septicemia	0	0	2017-11-24	2017-12-06	26	2	2017-11-25	94.8	7.3	7.4	46.5	529	2017-11-27	166.5	8.8	22	34.7	424.8	2017-11-30	192.4	8.8	11.2	25.6	397	2017-12-03	139.5	9.5	8.5	29.9	383.9
163	Enteritis	1	51	2017-11-09	2017-11-12	84	2	2017-11-09	20.4	9.2	8.7	19.8	966.3	2017-11-15	12.4	5.8	18.5	24.4	700.6	2017-11-22	15.1	7.5	9.5	24.7	1037.3
164	Septicemia	0	5	2017-11-23	2017-12-05	34	2	2017-11-26	122.7	7.3	4.3	25.1	360.5	2017-12-04	52.5	10.4	3.9	20.2	1188.5
165	Septicemia	0	0	2017-11-09	2017-11-14	36	1	2017-11-10	54.9	5.9	5.4	49.7		2017-11-11	54	5.3	3.4	22.3	193.7	2017-11-12	73.7	5.3	6.2	43		2017-11-12	88.9	6.5	7.5	63.1
166	Septicemia/Pulmonary infection	0	1	2017-11-06	2017-11-21	39	1	2017-11-06	79.6	6.8	10.4	83.1	496.4	2017-11-08	136.3	7.7	6.9	42.9	441.6	2017-11-17	127.5	9.4	6.1	21.7	675.2
167	Septicemia	0	0	2017-11-02	2017-11-08	33	1	2017-11-03	70.1	6.3	5.9	67.8	468.7	2017-11-06	112.3	11.1	4.4	27.3		2017-11-06	201.4	10.9	5.7	25.2		2017-11-09	150.8	9.1	4.8	51.6	648.5
168	Septicemia	0	0	2017-11-02	2017-11-07	33	1	2017-11-03	6.5	6.6	4.7	46.8	322.4	2017-11-06	77.5	24.5	32.7	47.3
169	Pulmonary infection	1	658	2017-11-08	2017-11-13	33	2	2017-11-11	23.5	7.8	4	22.9	420.7	2017-11-13	26.7	9.4	7.8	37.4
170	Pulmonary infection	1	526	2017-11-20	2017-11-28	150	3	2017-11-23	3.4	1	20.5	41.8		2017-11-28	4.1	1.5	17.7	49.8
171	Skin and soft tissue infection	0	680	2017-11-30	2017-12-04	250	3	2017-12-01	18.2	6.9	16	28.7		2017-12-02	11.2	3.5	13.5	35.3		2017-12-03	14.2	4.3	13.1	35.9		2017-12-04	8.6	3.4	16.7	21.5
172	Pulmonary infection	1	109	2017-10-28	2017-11-22	100	3	2017-10-28	5.8	2.7	19.4	28.7		2017-11-15	22.6	10.4	21.1	128.1		2017-11-16	16.5	7.9	32.6	87.9		2017-11-18	8.7	3.8	37.6	42.2
173	Septicemia	1	18	2017-12-03	2017-12-14	24	2	2017-12-06	14	7.6	5.5	12.5		2017-12-11	10.1	5.6	3.8	11.7	377.9
174	Intracranial infection	1	307	2017-04-18	2017-04-25	180	3	2017-04-21	2.7	0.8	24.6	33.7		2017-04-24	3.1	1.3	23.6	40.5
175	Intracranial infection	1	3	2017-01-26	2017-02-04	28	1	2017-01-27	142.2	9.2	7.8	22		2017-02-03	22.5	10.3	12.6	47.8
176	Myodystony	1	472	2017-01-06	2017-01-15	200	3	2017-01-08	3.2	1.4	21.4	33.2		2017-01-15	4	1.6	13	26.1
177	Pulmonary infection	0	2801	2016-11-15	2016-11-22	500	3	2016-11-15	2.4	1.2	8.2	27.1		2016-11-17	5.2	2	8.5	28.4		2016-11-18	6	1.9	7.1	29.7		2016-11-20	6.2	2.2	5.2	32
178	Peritonitis	1	2304	2018-03-01	2018-03-06	300	3	2018-03-02	5.6	2.5	16.4	20.5		2018-03-05	7.7	4.3	22.6	18.3
179	Others	1	2794	2017-04-19	2017-04-25	200	2	2017-04-21	40.4	4.5	11.9	30.7		2017-04-24	38.2	4.1	15.6	29.1
180	Septicemia	1	6	2017-05-19	2017-05-31	110	3	2017-05-21	53.4	16	18.2	31.3		2017-05-27	32.1	10.8	32.6	33.7
181	Pulmonary infection	0	755	2017-04-26	2017-05-05	300	3	2017-04-26	3.9	1	16.5	36.6		2017-04-30	3.7	1.5	14.5	24.3		2017-05-04	9.2	3.7	9.7	26.4
182	Intracranial infection	0	5902	2017-04-30	2017-05-07	500	4	2017-05-02	12.5	5.9	5.4	9.1		2017-05-05	12.5	5.9	5.4	9.1
183	Septicemia	1	7	2017-07-09	2017-07-16	65	2	2017-07-11	107	7.5	24.6	32.8		2017-07-14	122	8.2	34.6	44.5
184	Systemic lupus erythematosus	0	6111	2017-06-30	2017-07-09	500	4	2017-07-01	20.7	8.5	24.7	25.7		2017-07-03	24.2	10.5	21.2	18.9		2017-07-04	21.6	8.7	27.1	24.1		2017-07-05	21.8	9.2	23.9	17.7
185	Pulmonary infection	1	1711	2017-10-09	2017-10-13	300	3	2017-10-09	5.9	2.3	13.6	22.8		2017-10-11	7.2	3	15.7	25.6
186	Sepsis	0	2790	2017-09-23	2017-09-27	500	3	2017-09-25	6.2	1.9	6	7.7		2017-09-26	9.8	4.1	4.8	7.5
187	Sepsis/Skin and soft tissue infection	0	2823	2017-10-26	2017-10-31	500	3	2017-10-26	12.7	5.7	5.3	8.7		2017-10-31	8.6	3.7	1.3	9.1
188	Pulmonary infection	1	1	2017-10-08	2017-10-25	46	2	2017-10-08	88.5	6.6	6.8	62.4	196.9	2017-10-09	125.6	8.1	4.7	40.9		2017-10-11	191.6	10.4	4.4	35	225.7	2017-10-13	128.2	9.8	5.1	24.9	199.1
